# Supplementary material for: 15N-Labeled ionic probes for bioanalytical mass spectrometry
Source: Royal Society of Chemistry journal article supplement (doi:10.1039/c003784b), 2010-01-01

## **<sup>15</sup>N-Labeled ionic probe for bioanalytical mass spectrometry**

Fumihiro Ito\*, Shin Ando, Masato Iuchi, Tomoko Nakamura, Satoko Yorita and Kentaro Yamaguchi\*

Faculty of Pharmaceutical Sciences at Kagawa Campus, Tokushima Bunri University,  
1314-1 Shido, Sanuki, Kagawa 769-2193, Japan.

### **Electronic Supplementary Information**

#### **Table Contents**

|                                                               |   |
|---------------------------------------------------------------|---|
| ● <sup>1</sup> H and <sup>13</sup> C NMR spectra of <b>8</b>  | 2 |
| ● <sup>1</sup> H and <sup>13</sup> C NMR spectra of <b>9</b>  | 3 |
| ● <sup>1</sup> H and <sup>13</sup> C NMR spectra of <b>3</b>  | 4 |
| ● <sup>1</sup> H and <sup>13</sup> C NMR spectra of <b>12</b> | 5 |
| ● <sup>1</sup> H and <sup>13</sup> C NMR spectra of <b>13</b> | 6 |
| ● <sup>1</sup> H and <sup>13</sup> C NMR spectra of <b>14</b> | 7 |
| ● <sup>1</sup> H and <sup>13</sup> C NMR spectra of <b>15</b> | 8 |
| ● Selected HMBC of correlation and assignment for <b>3</b>    | 9 |

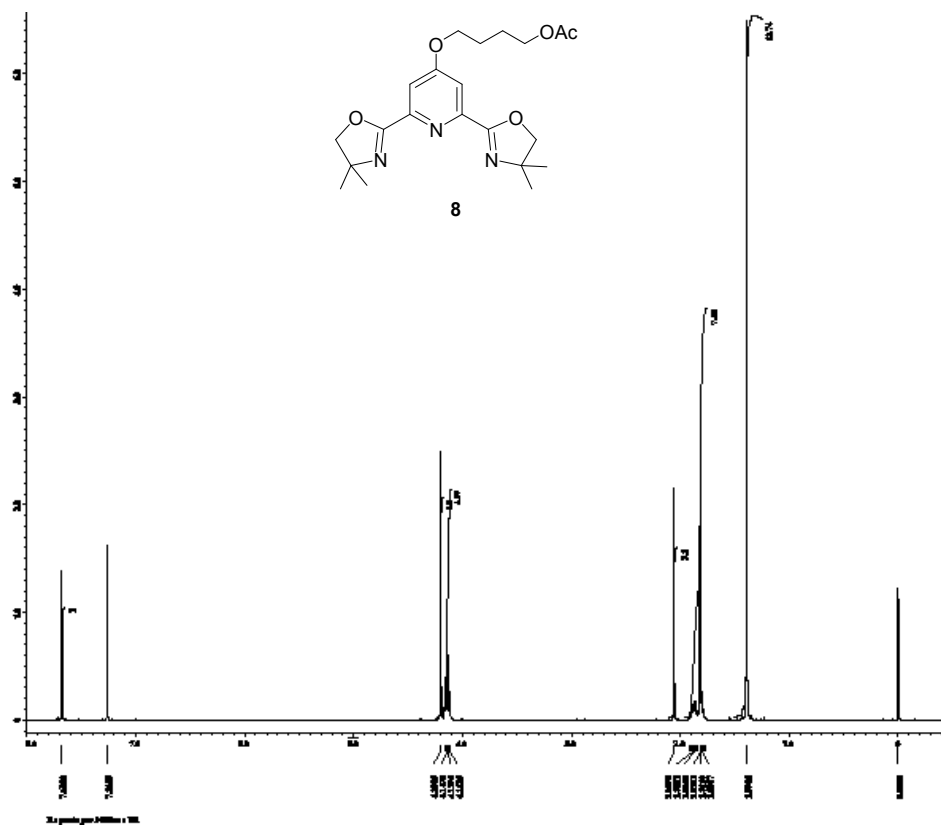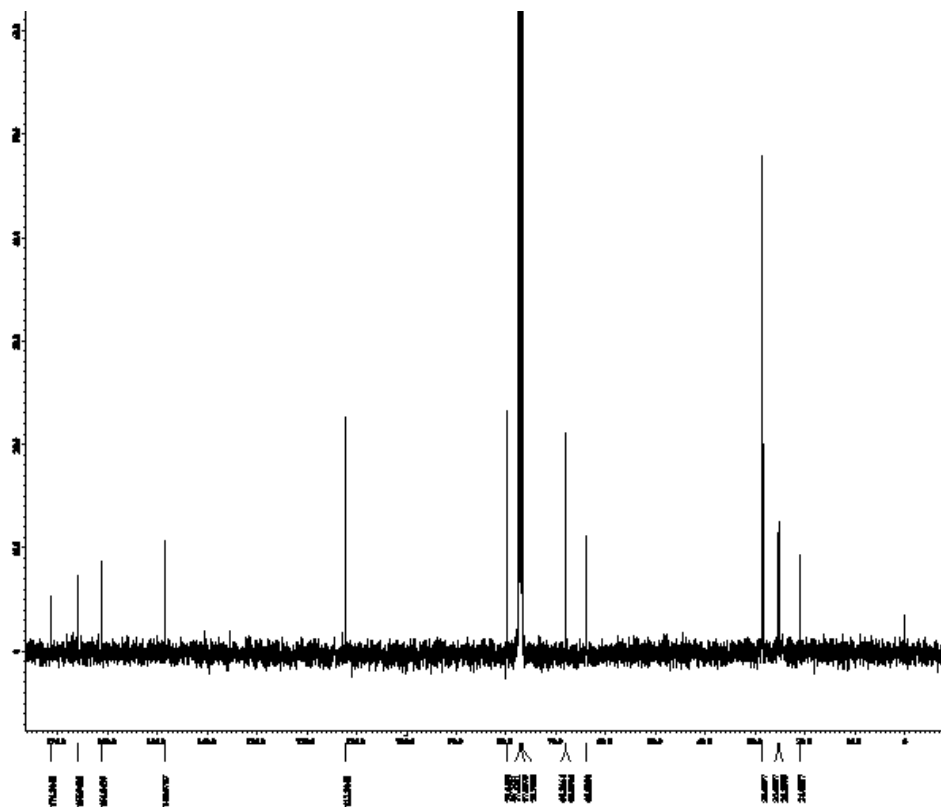

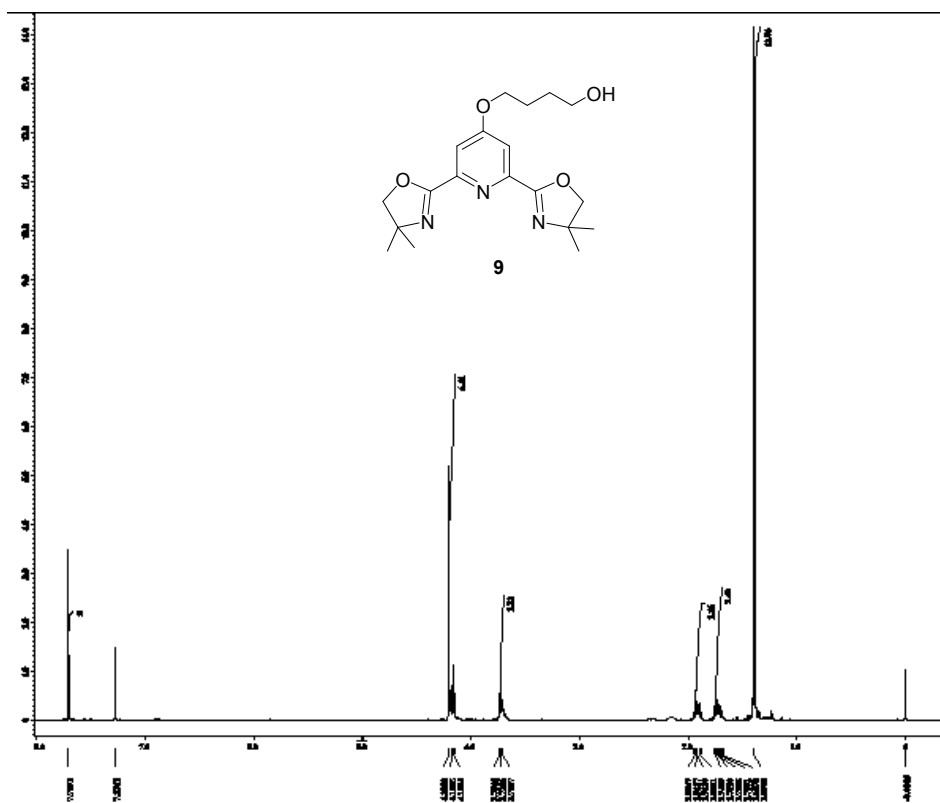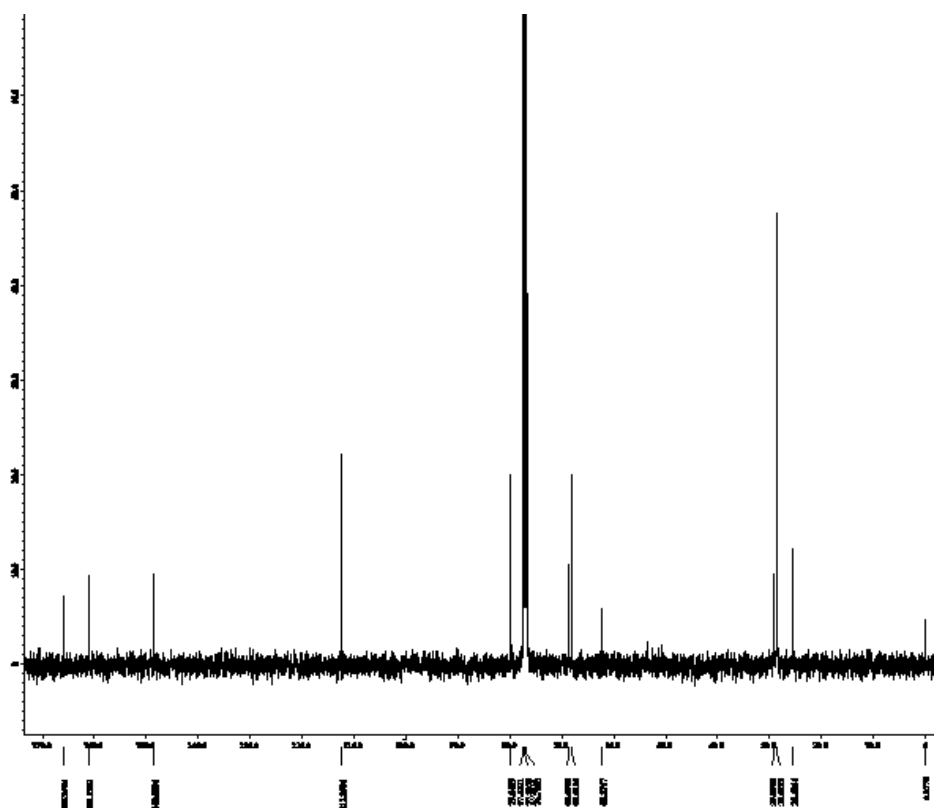

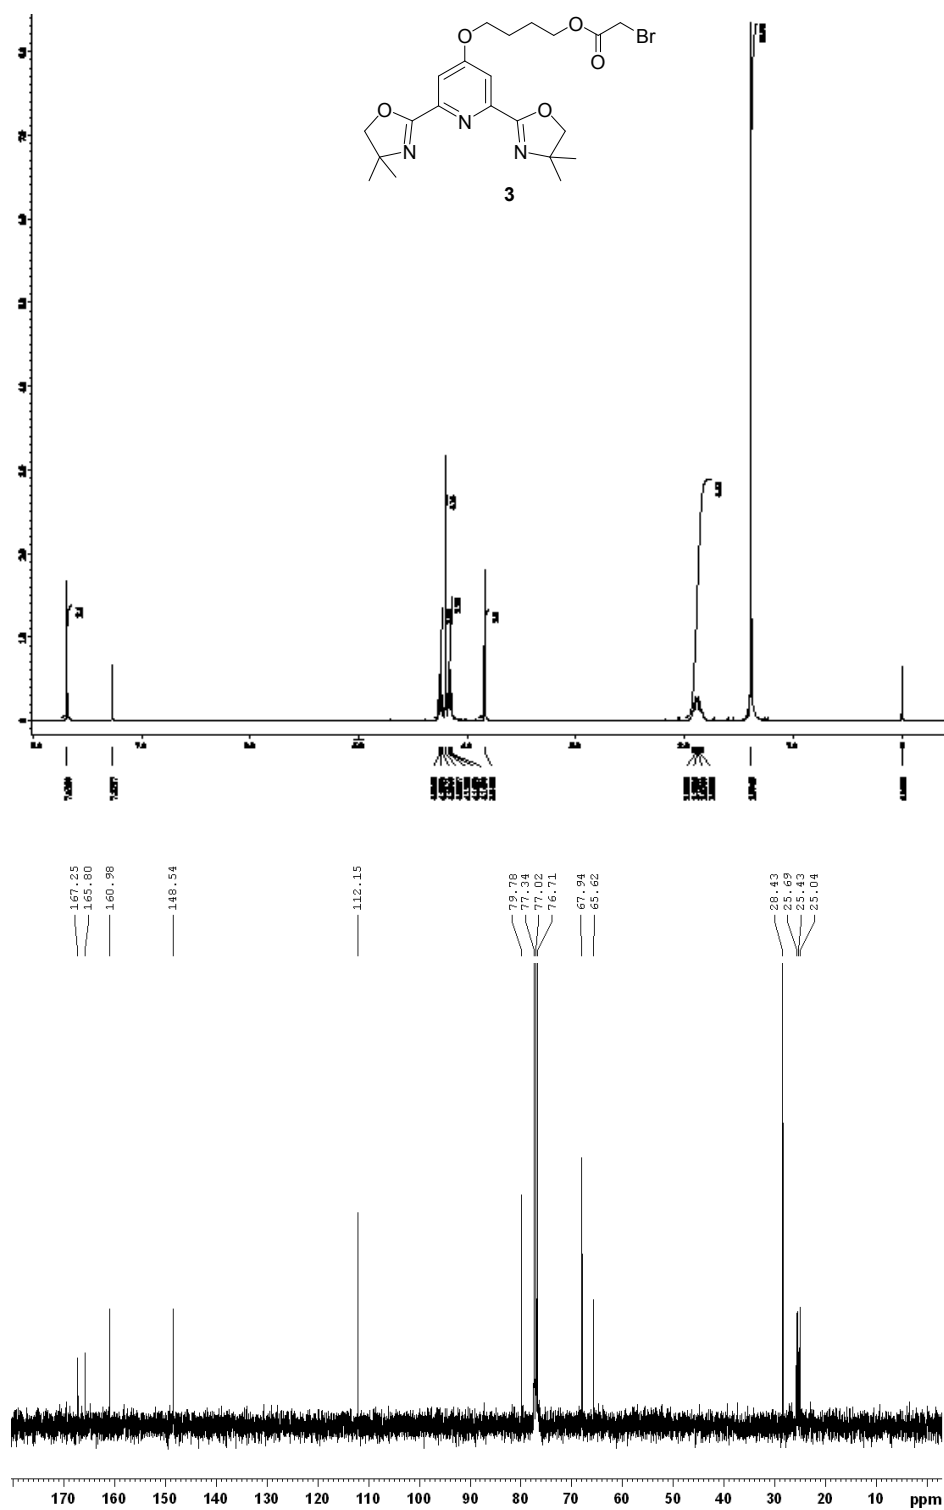

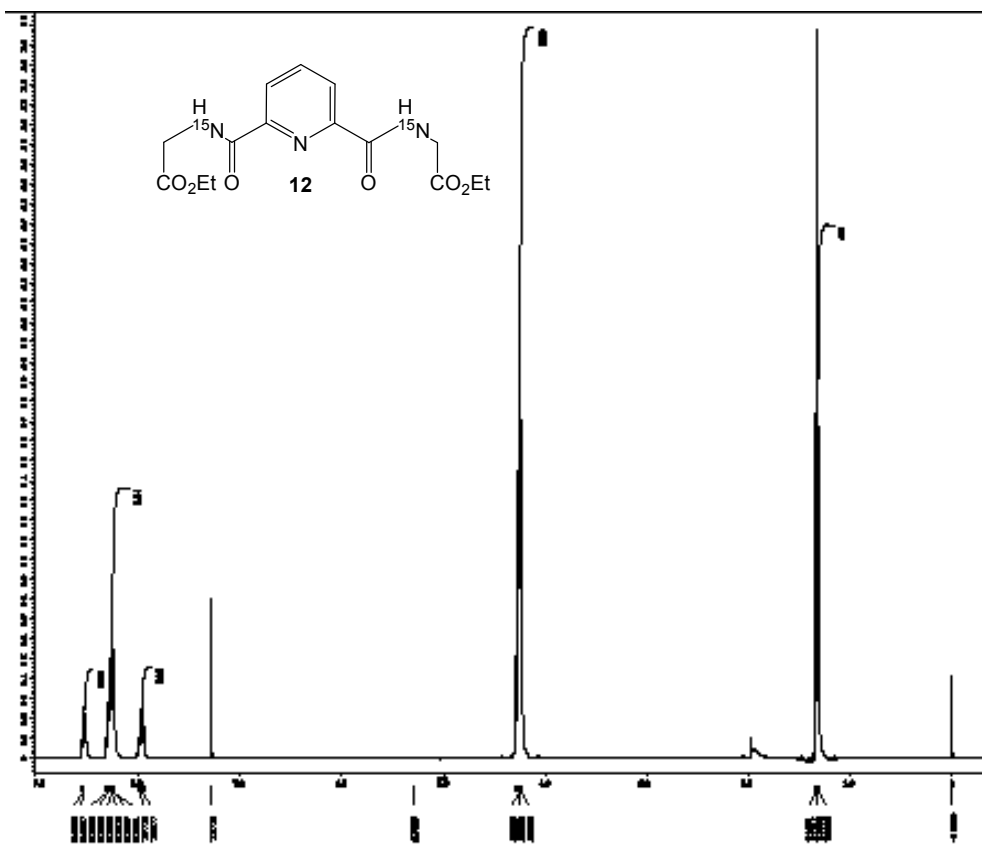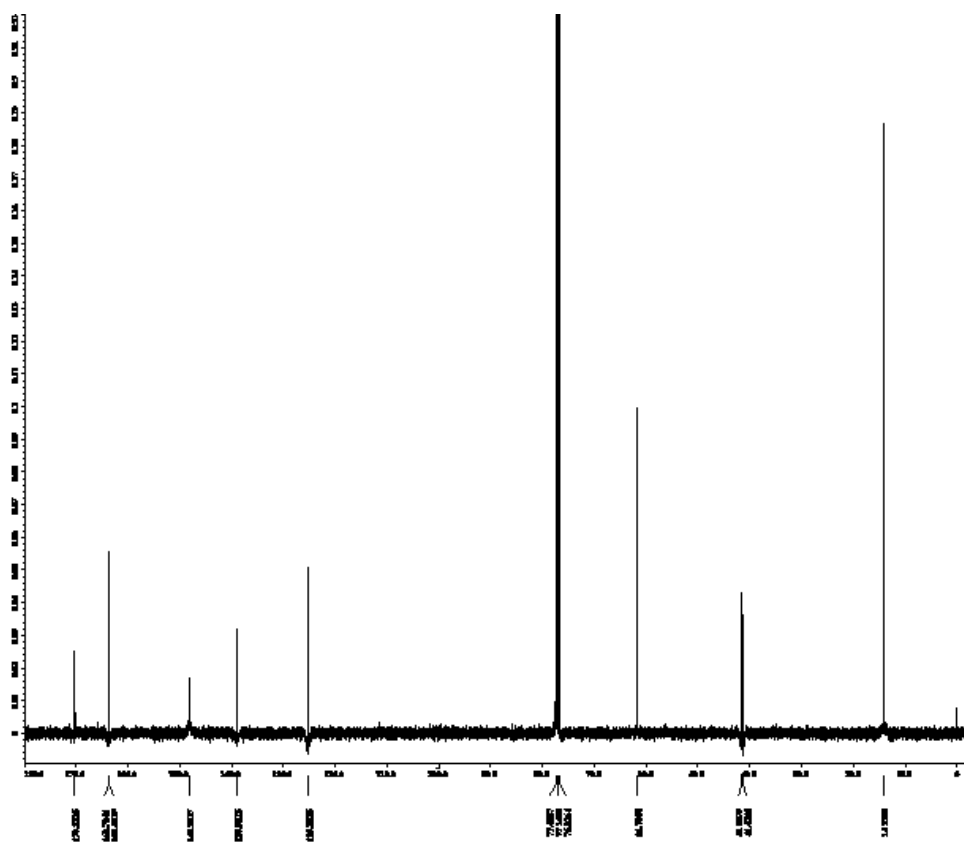

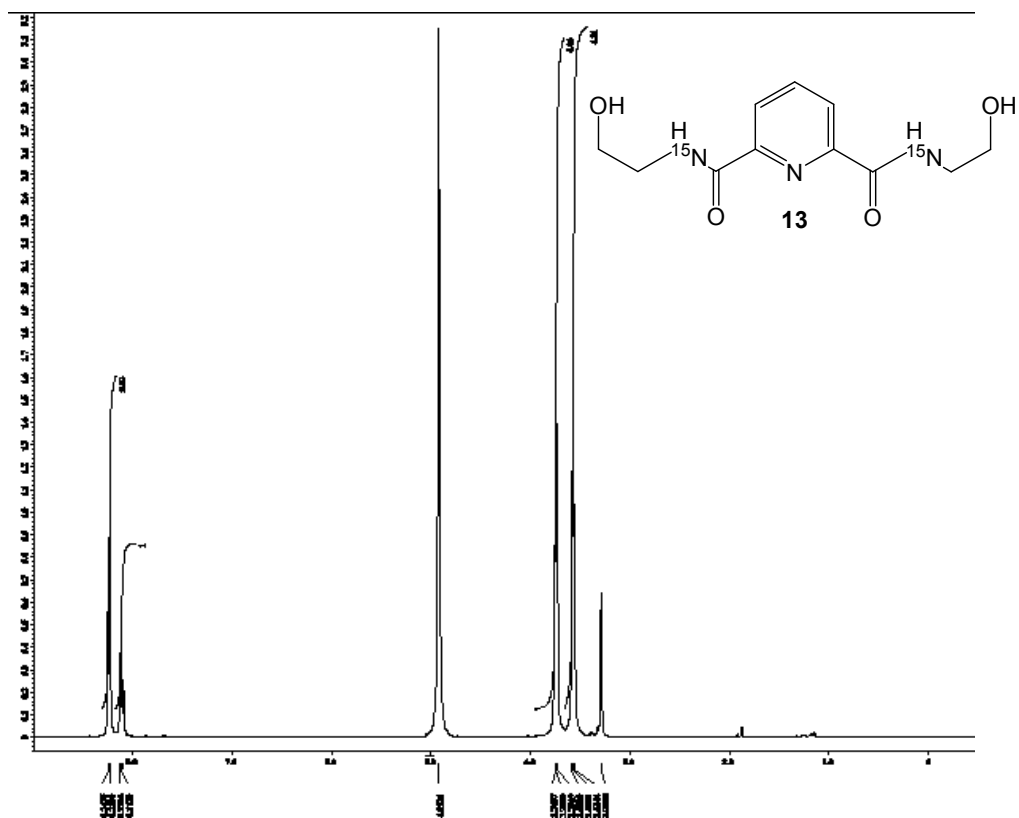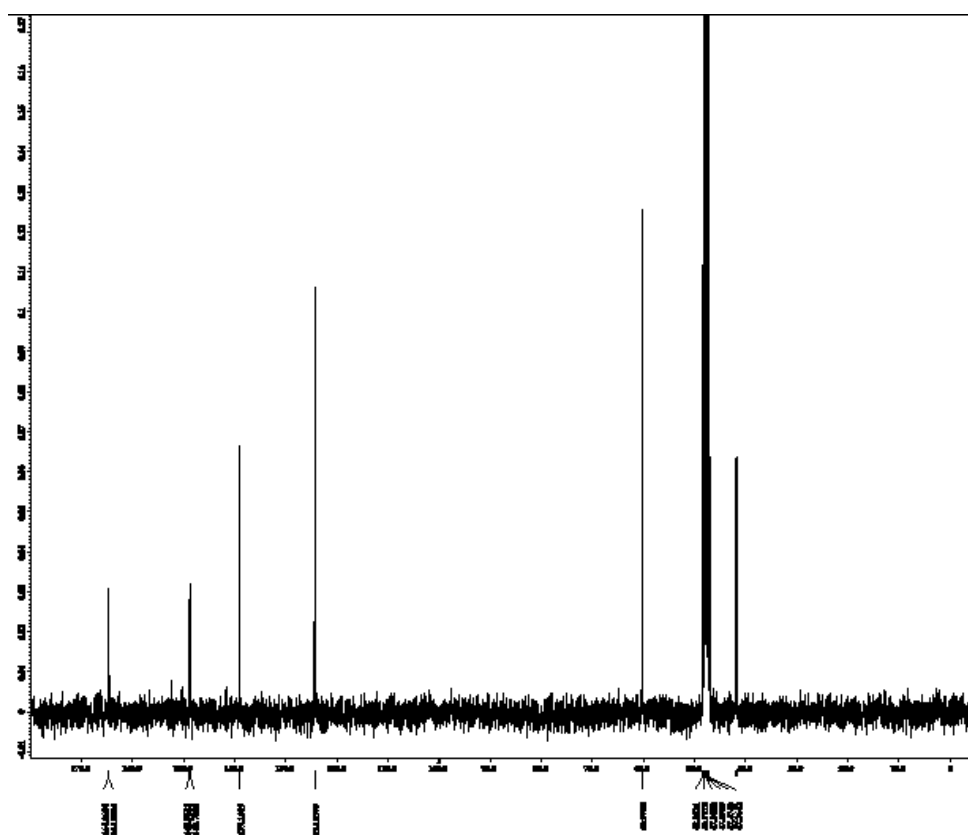

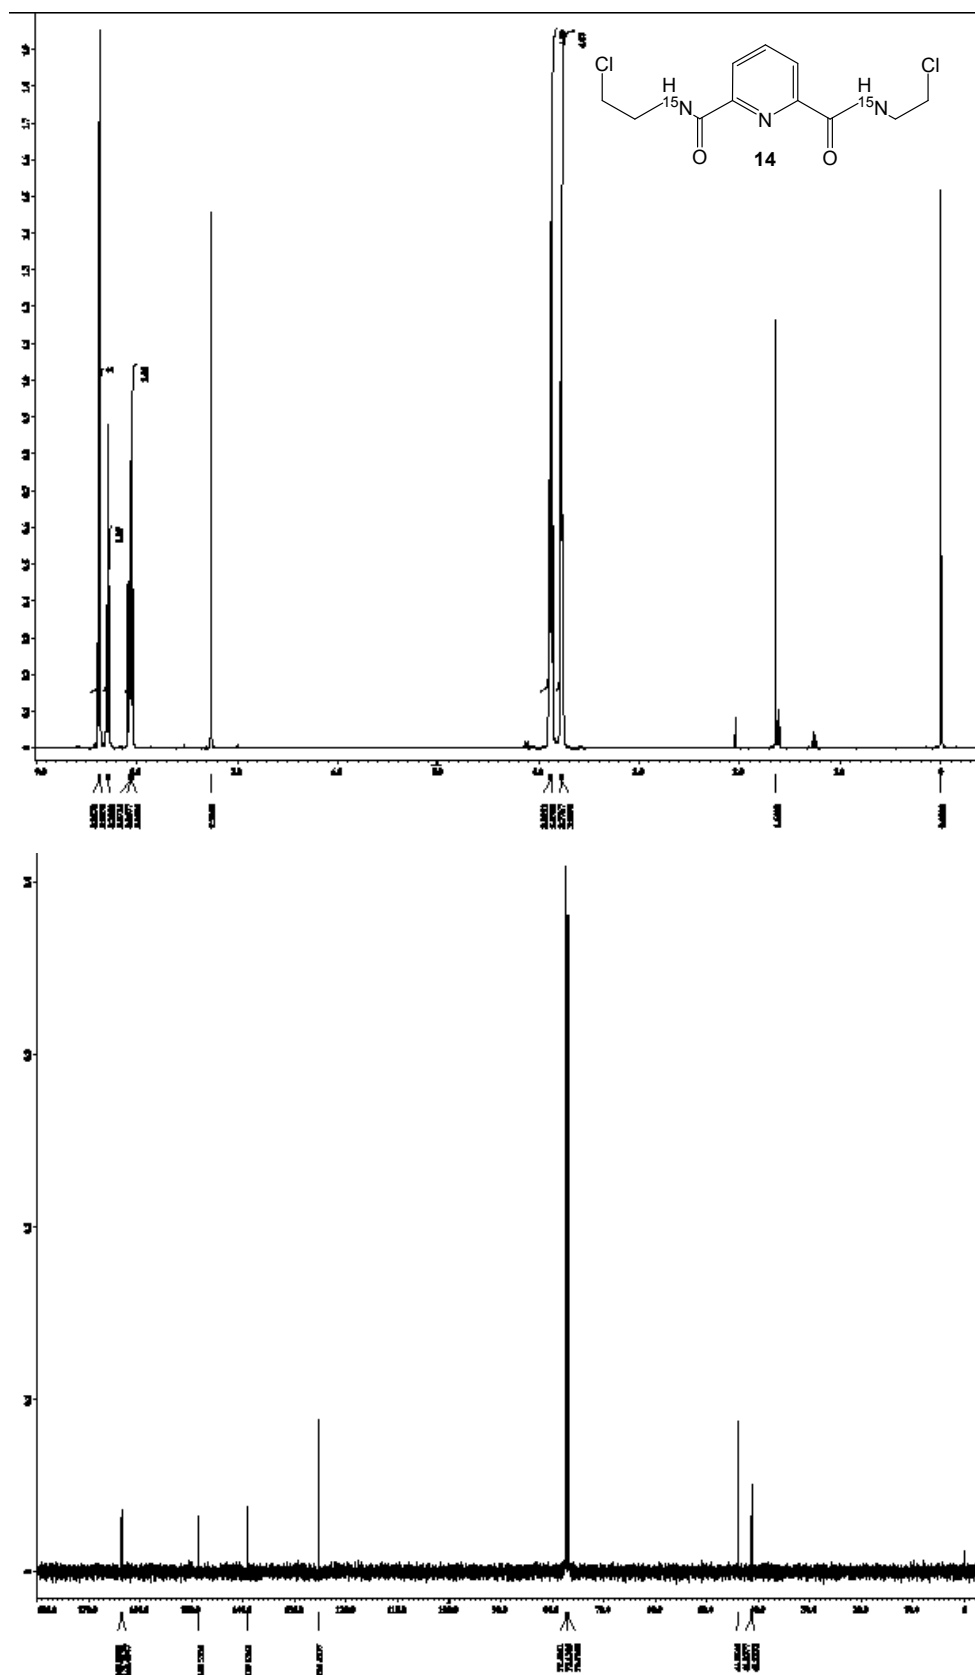

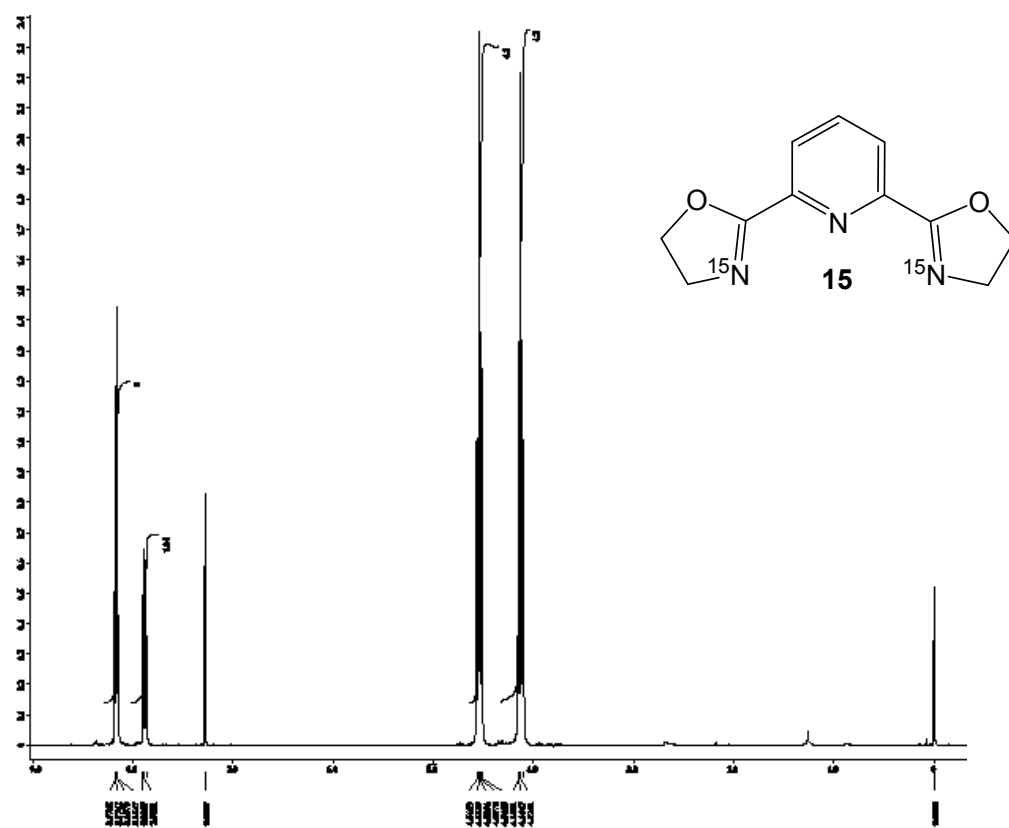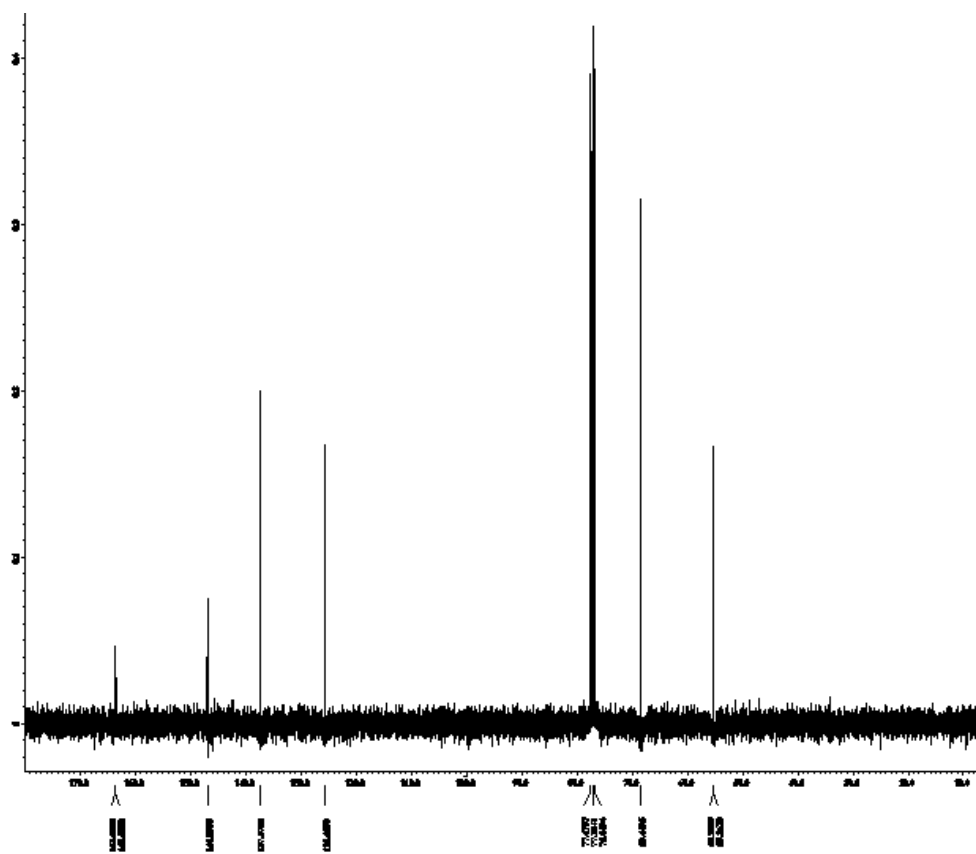



Selected HMBC of correlation and assignment. Chemical shift values ( $\delta$ , ppm)

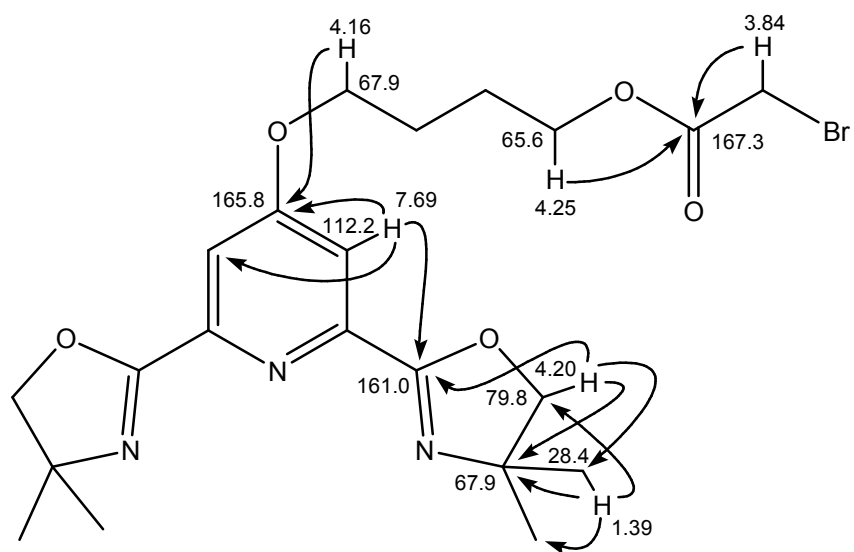

Supplement: c003784b.pdf [file c003784b.pdf]
